# Supplementary material for: Effect of RGO deposition on chemical and mechanical reliability of Ag nanowire flexible transparent electrode
Source: Royal Society of Chemistry journal article supplement (doi:10.1039/c6ra10338c), 2016-01-01
Supplement: c6ra10338c1.pdf [file c6ra10338c1.pdf]

**Supporting Information for “Effect of RGO Deposition on Chemical and Mechanical Reliability  
of Ag Nanowire Flexible Transparent Electrode”**

*Byungil Hwang, Minkyu Park, Taegeon Kim and Seung Min Han\**

Graduate School of Energy Environment Water and Sustainability, Korea Advanced Institute of  
Science & Technology, Daejeon, Republic of Korea, 305-701

Corresponding Author: smhan01@kaist.ac.kr

**Supporting Information 01.**

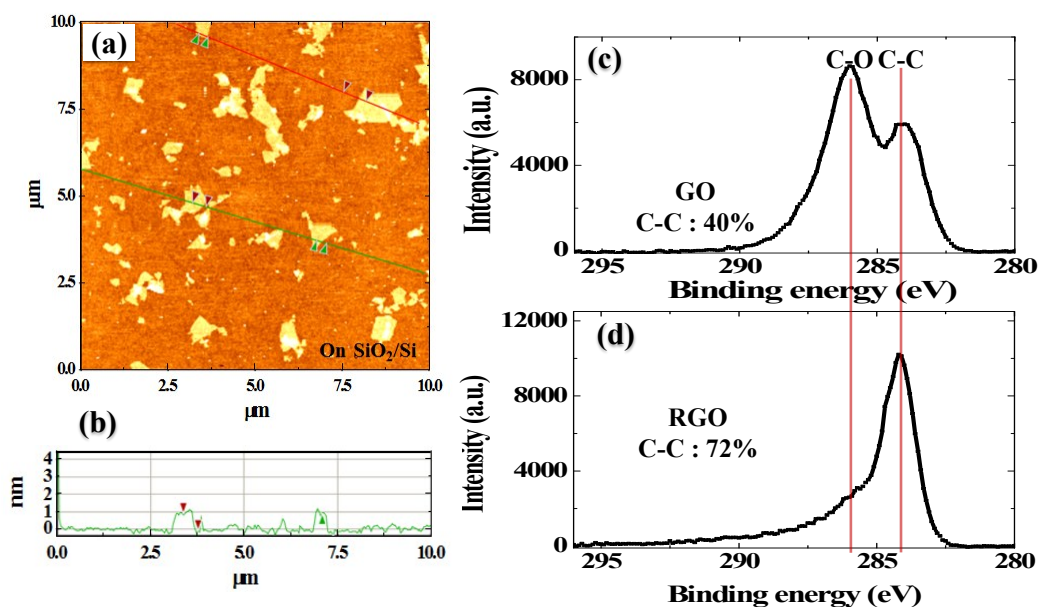

**Fig. S1.** (a) Typical topological AFM image of RGO sheets on Si substrate with SiO<sub>2</sub> layer, and (b) the line profile of the RGO sheets along the green line. (c) XPS spectrum obtained from GO sheets and (d) from RGO sheets.

### Supporting Information 02.

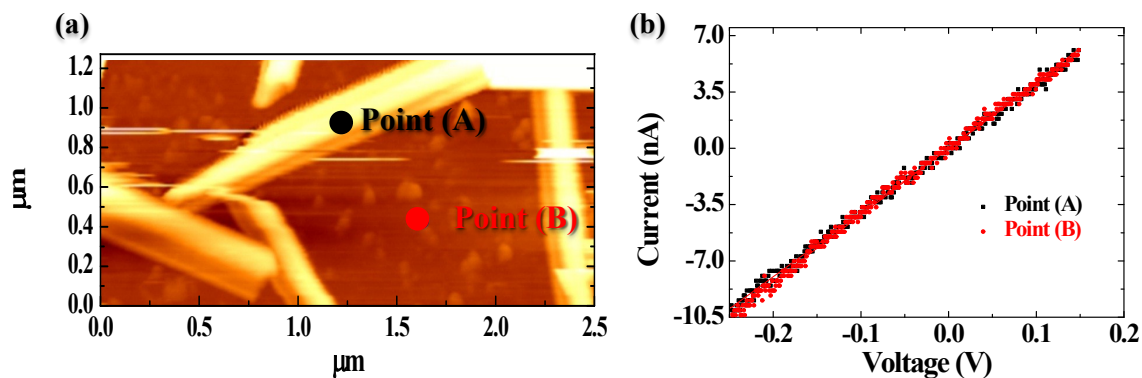

**Fig. S2.** (a) Topological AFM image of RGO layers on the Ag nanowire networks. (b) I-V curves measured at the two points indicated in (a). Point (A) is on the Ag nanowire Point (B) is only on the RGO area.

### Supporting Information 03.

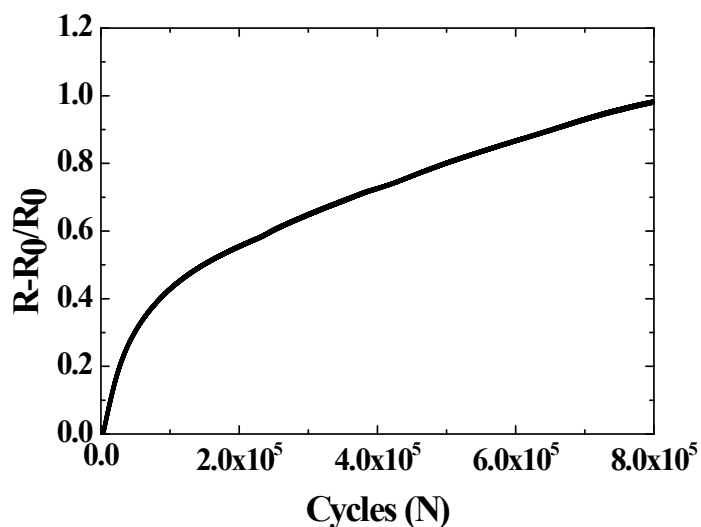

**Fig. S3.** Fractional resistance change of Ag thin film tested under 1.5% strain for 800,000 cycles. The thickness of the Ag thin film was  $\sim 100$  nm, and the sheet resistance was measured as  $\sim 0.2$  ohm/sq. Ag thin film showed significantly higher increase in fractional resistance of 90% at the 800,000 cycles compared to that of Ag nanowire networks showing only 1.6% increase in fractional resistance.

#### Supporting Information 04.

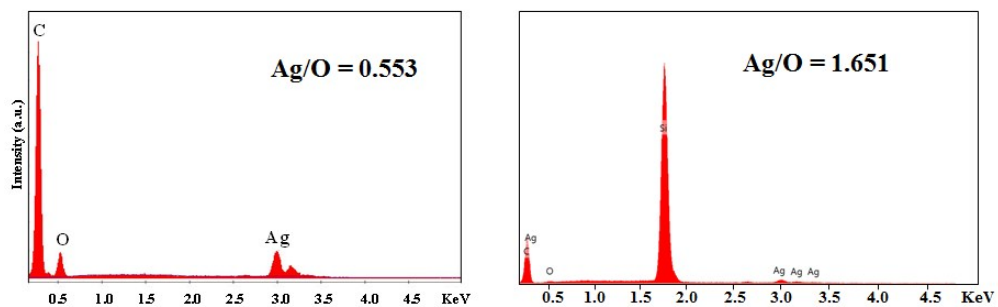

**Fig. S4.** The result of EDX analysis for Ag nanowire electrode (left) and Ag nanowire/RGO hybrid electrode (right) after exposure to ambient air at 70 °C for 132h.

#### Supporting Information 05.

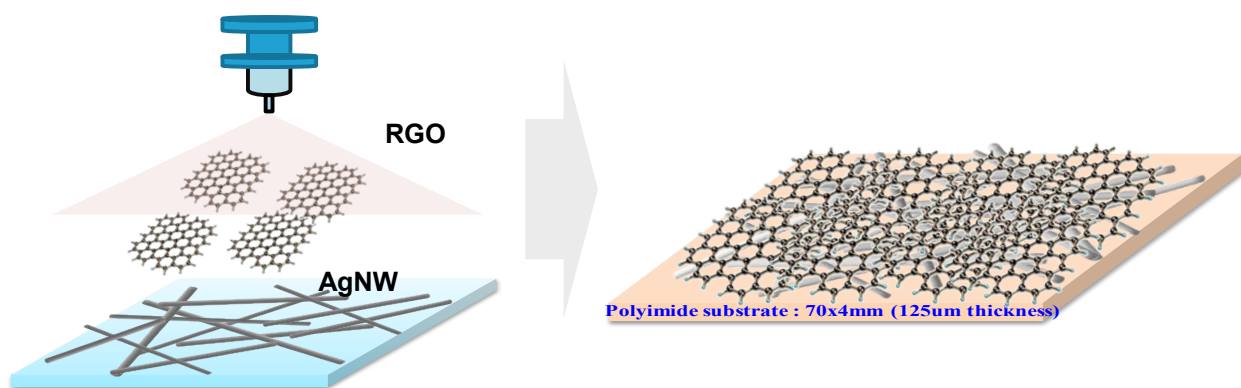

**Fig. S5.** Schematics for the Ag nanowire/RGO hybrid electrode.
